1 First Mass Mortality of Marine Mammals Caused by Highly Pathogenic Influenza Virus  
2 (H5N1) in South America

3 Víctor Gamarra-Toledo<sup>1,2</sup>, Pablo I. Plaza<sup>1\*</sup>, Giancarlo Inga<sup>3,4</sup>, Roberto Gutiérrez<sup>2,3</sup>,  
4 Oscar García-Tello<sup>3</sup>, Leonela Valdivia-Ramírez<sup>3</sup>, Deyvis Huamán-Mendoza<sup>3</sup>, José C.  
5 Nieto-Navarrete<sup>3</sup>, Sandra Ventura<sup>3</sup>, Sergio A. Lambertucci<sup>1</sup>

6

7 <sup>1</sup> Grupo de Investigaciones en Biología de la Conservación, Laboratorio Ecotono,  
8 INIBIOMA, Universidad Nacional del Comahue - CONICET, Quintral 1250  
9 (R8400FRF), San Carlos de Bariloche, Argentina.

10

11 <sup>2</sup> Museo de Historia Natural (MUSA), Universidad Nacional de San Agustín de  
12 Arequipa, Av. Alcides Carrión s/n, Arequipa,  
13 Perú.

14

15 <sup>3</sup> Servicio Nacional de Áreas Naturales Protegidas por el Estado (SERNANP). Calle  
16 Diecisiete 355, Urb. El Palomar, San Isidro, Lima, Perú.

17

18 <sup>4</sup> Asociación Convive Perú, Puerto Maldonado, Madre de Dios, Perú.

19

20 \*Corresponding author: [plazapablo22@gmail.com](mailto:plazapablo22@gmail.com)

21

22 **ABSTRACT**

23 We report the first worldwide infection and massive mortality associated with a Highly  
24 Pathogenic Influenza Virus (H5N1) in sea lions of Peru. The transmission pathway of  
25 H5N1 may have been through the close contact of sea lions with infected wild birds.  
26 We cannot rule out direct transmission among sea lions.

27 The recent global epidemic event (2020-2022) caused by the highly pathogenic avian  
28 influenza (HPAI) A (H5N1) is the largest observed so far, several global outbreaks  
29 having been caused (1,2). This is the first time the presence of this pathogen has been  
30 registered in some regions, where it has produced massive mortality in wild birds (2–4).  
31 This is of great concern and suggests a change has taken place in the dynamics of this  
32 pathogen (2).

33 At the end of 2022, the H5N1 virus reached South America (Peru, Ecuador, Colombia,  
34 Venezuela and Chile), with alarming outcomes in Peru (4). This pathogen was detected  
35 for the first time in wild birds in Peru on 13 November, as it caused very huge mortality  
36 levels (>22,000 birds over 4 weeks within protected areas) (4). Reports on both  
37 protected and non-protected areas suggest the virus generated a disease that killed at  
38 least >50,000 wild birds by the end of 2022, particularly Peruvian pelicans (*Pelecanus*  
39 *thagus*) and Peruvian boobies (*Sula variegata*) (4, Gamarra-Toledo et al. unpublished  
40 data). Most birds showed signs of neurological problems (e.g., incoordination, tremors  
41 and partial convulsions) before dying; impressive images of sandy beaches with dozens  
42 of dying birds highlighted the magnitude of this catastrophe (Suppl Mat,  
43 <https://www.youtube.com/watch?v=45UZVY4IxTY>). The large biomass of infected  
44 wild birds may have led to a spillover event affecting predators and scavengers,  
45 including marine mammals cohabiting with them, as reported in other parts of the world  
46 (5). In this article, we report the death of 634 sea lions (mainly *Otaria flavescens* and a  
47 few *Arctocephalus australis*) on Peruvian coasts over 5 weeks, and give details of the  
48 analyses that prove their infection with the Highly Pathogenic Influenza Virus (H5N1).

## 49 **The Study**

50 During January and the first days of February 2023, more than six hundred sea lions  
51 were found dead or dying on Peruvian beaches (e.g., Asia, Chorrillos, Cerro Azul and

52 Chilca beaches) and in protected areas (e.g., Reserva Nacional Paracas, Reserva  
53 Nacional San Fernando, Reserva Nacional Sistema de Islas, Islotes y Puntas Guaneras)  
54 (Fig. 1, Table 1). The high mortality observed was worrisome; for instance, up to 100  
55 dead individuals floating together in the sea – an unprecedented observation for this  
56 geographical region (Fig. 1, Table 1). The clinical symptoms of dying individuals were  
57 mainly neurological, such as tremors, convulsions and paralysis. They also showed  
58 respiratory signs such as dyspnea, tachypnea, nasal and buccal secretions and  
59 pulmonary edema. Most dead animals were female, and several abortions were  
60 observed. There are no other records of such high mortality of aggregated sea lions.  
61 Individuals were examined by veterinarians and some dead animals were necropsied  
62 (see Fig. 2 A, B). The body condition of the sea lions necropsied ranged from good to  
63 very good, suggesting they died due to an acute health problem. Substantial quantities  
64 of whitish secretions filling the upper respiratory tracts (trachea and pharynx) were  
65 observed in the necropsies and in dying animals (Fig. 2 C), which explains the severe  
66 dyspnea and tachypnea clinically observed by veterinarians. Lungs were congestive,  
67 with hemorrhagic focus compatible with interstitial pneumonia. Brains were also  
68 congestive with hemorrhagic focus compatible with encephalitis, which explains the  
69 neurological signs observed in dying individuals (Fig. 2 D). The small intestine showed  
70 necrotic focus compatible with duodenitis. Of epidemiological and conservation  
71 concern, a total of 634 dead individuals belonged mainly to *Otaria flavescens* (n=630)  
72 and some to *Arctocephalus australis* (n=4). However, the latter species was not tested  
73 and there are no other records of high mortality in this species, so we cannot confirm the  
74 actual cause of their death. At the time of writing this dispatch (February 2023) sea  
75 lions mortalities continue.

76 Given the epidemiologic situation produced by H5N1 in wild birds that cohabit with  
77 these sea lions (4), samples were taken in a subset of individuals to diagnose this virus.  
78 To diagnose HPIV, samples of *Otaria flavescens* (n=6; including 3 samples from  
79 different parts of each animal) were taken inside a protected area (Reserva Nacional  
80 Paracas) and sent to the Avian Pathology Laboratory of the Universidad Nacional  
81 Mayor de San Marcos. Samples consisted of organs such as kidneys, spleen and lungs,  
82 stomach contents, and oral, nasal and rectal swabs (Fig 2 E). Real time RT-PCR  
83 targeting the Influenza A matrix segment were performed: all the tested individuals  
84 were positive for influenza A (Table 1). Through posterior RT-PCR analysis using  
85 specific primers to identify the hemagglutinin and neuraminidase, this virus was  
86 characterized as Influenza A of the H5N1 subtype, the virus that had produced massive  
87 mortality of wild birds in previous months (4). Almost at the same time (between  
88 January 18 and 26) SERFOR (Servicio Nacional Forestal y de Fauna Silvestre) took  
89 another 6 samples from dead animals outside protected areas (beaches of the provinces  
90 of Lima and Cañete), following the same procedure. These samples were analyzed at  
91 the Genomics Laboratory of the Pontificia Universidad Católica del Perú. Three sea lion  
92 samples also tested positive for HPAI H5N1 (OFICIO-0017-2023-MIDAGRI-  
93 SENASA-DSA), and a dolphin (*Tursiops truncatus*) was also reported as testing  
94 positive in Piura, in the northern region of Peru.

## 95 **Conclusions**

96 We show that sea lions (*Otaria flavescens*) of Peru, an endangered species according to  
97 the national legislation (6), were infected by HPAI (H5N1) and developed a deadly  
98 associated disease producing massive mortality in several regions of the Peruvian  
99 coastline (Fig. 1). The sea lion mass mortality described is compatible with systemic  
100 HPIV that resulted in acute encephalitis and pneumonia. Some specific cases of

101 infection and mortality of marine mammals due to HPIV with similar clinical and  
102 anatomopathological characteristics have been reported in previous studies around the  
103 world (5,7,8). For instance, 1,400 dead harbor seals (*Phoca vitulina*) were found dead in  
104 Germany alone; necropsied individuals (n=17) showed congestive lungs and interstitial  
105 pneumonia due to HPIV (7). Similarly, in USA, seal mortalities were reported with  
106 pneumonia and neurological symptoms due to H5N1 (5). However, to our knowledge,  
107 this is the first confident report of massive mortality by disease associated with HPIV  
108 (H5N1) in sea lions, and the first report of wild mammal mortality in South America.  
109 The source of the HPAI affecting these sea lions was very probably the large number of  
110 infected birds/carcasses on the Peruvian coastline (4). Sea lions may be infected by  
111 close contact with these carcasses and even through their consumption (see Fig. 2 F).  
112 However, the transmission pathway remains unknown until now.

113 Such high levels of mortality in a social animal are worrisome. We cannot exclude  
114 direct transmission among sea lions due to their colonial breeding, and because many  
115 animals died simultaneously in groups. In fact, based on recent research suggesting the  
116 first mammal-to-mammal infection in minks (*Neovison vison*) (9) and the large number  
117 of sea lions currently affected, we cannot rule out that the virus has adapted to mammals  
118 and that sea lion-sea lion transmission has begun in Peru; this should be urgently  
119 investigated. Moreover, the mass mortality of animals that can weigh around 350 kg  
120 (10) produces an enormous biomass of infected tissue, which could perpetuate the  
121 transmission of H5N1 and other pathogens. This could have serious consequences for  
122 the ecosystem and human health.

123 Further research is required to address the transmission pathway in social mammals.  
124 This is particularly important in our case, given the complexities of the H5N1 Peruvian  
125 outbreak; i.e., severe mortality of wild birds, potential wild bird spillover to mammals,

126 dead animals on beaches with human presence and human interaction with infected  
127 animals (see Supplementary Material Video 1). Since the emergence of the  
128 A/goose/Guangdong/1/1996 (Gs/Gd) H5N1 influenza A virus in China in 1996,  
129 different Highly Pathogenic Influenza Viruses (HPIV) have produced thousands of  
130 human infections with a lethality of 50% (3,11). We would like to call attention to the  
131 fact that in this geographical region of the world, human–infected animal interaction is  
132 common, so infections might begin to rise (there is already one case of a 9-year-old girl  
133 in Ecuador; [https://www.eldiario.com.ar/242825-se-confirmando-el-primer-caso-de-gripe-](https://www.eldiario.com.ar/242825-se-confirmando-el-primer-caso-de-gripe-aviar-en-nina-de-9-anos-en-ecuador/)  
134 [aviar-en-nina-de-9-anos-en-ecuador/](https://www.eldiario.com.ar/242825-se-confirmando-el-primer-caso-de-gripe-aviar-en-nina-de-9-anos-en-ecuador/)) and this must be addressed if we are to avoid the  
135 risk of a pandemic through evolutionary emergence (12).

## 136 **References**

- 137 1. Wille M, Barr IG. Resurgence of avian influenza virus. *Science*. 2022 Apr  
138 29;376(6592):459–60.
- 139 2. Harvey JA, Mullinax JM, Runge MC, Prosser DJ. The Changing Dynamics of Highly  
140 Pathogenic Avian Influenza H5N1: Next Steps for Management & Science in North  
141 America. 2022;
- 142 3. Ramey AM, Hill NJ, DeLiberto TJ, Gibbs SE, Camille Hopkins M, Lang AS, et al.  
143 Highly pathogenic avian influenza is an emerging disease threat to wild birds in  
144 North America. *The Journal of Wildlife Management*. 2022;86(2):e22171.
- 145 4. Gamarra-Toledo V, Plaza PI, Gutiérrez R, Luyo P, Hernani L, Angulo F, et al. Avian  
146 flu threatens Neotropical birds. *Science*. 2023;379(6629):246–246.
- 147 5. Puryear W, Sawatzki K, Hill N, Foss A, Stone JJ, Doughty L, et al. Outbreak of  
148 Highly Pathogenic Avian Influenza H5N1 in New England Seals. *bioRxiv*.  
149 2022;2022–07.
- 150 6. Ministerio de Agricultura y Riego. Decreto Supremo N° 004-2014-MINAGRI. El  
151 Peruano. 2014;pp.520497– 520504.
- 152 7. Bodewes R, Bestebroer TM, van der Vries E, Verhagen JH, Herfst S, Koopmans MP,  
153 et al. Avian influenza A (H10N7) virus–associated mass deaths among harbor seals.  
154 *Emerging infectious diseases*. 2015;21(4):720.
- 155 8. Shin DL, Siebert U, Lakemeyer J, Grilo M, Pawliczka I, Wu NH, et al. Highly  
156 pathogenic avian influenza A (H5N8) virus in gray seals, Baltic Sea. *Emerging*  
157 *infectious diseases*. 2019;25(12):2295.

- 158 9. Agüero M, Monne I, Sánchez A, Zecchin B, Fusaro A, Ruano MJ, et al. Highly  
159 pathogenic avian influenza A (H5N1) virus infection in farmed minks, Spain,  
160 October 2022. *Eurosurveillance*. 2023;28(3):2300001.
- 161 10. Vaz-Ferreira R. South American sea lion *Otaria flavescens* (Shaw, 1800). *Handbook*  
162 *of marine mammals*. 1981;1:39–65.
- 163 11. Shi J, Zeng X, Cui P, Yan C, Chen H. Alarming situation of emerging H5 and H7  
164 avian influenza and effective control strategies. *Emerging Microbes & Infections*.  
165 2023;12(1):2155072.
- 166 12. Tripathi A, Dhakal HC, Adhikari K, Chandra Timsina R, Wahl LM. Estimating the  
167 risk of pandemic avian influenza. *Journal of Biological Dynamics*. 2021;15(1):327–  
168 41.
- 169
- 170
- 171



172 **Figure 1.** Map of geographical distribution of high mortalities in sea lions in January  
173 and February 2023 and sampling localities (green triangle and yellow star) for sea lions  
174 testing positive of Highly Pathogenic Influenza Virus (H5N1) on the Peruvian coastline  
175 (SERFOR = Servicio Nacional Forestal y de Fauna Silvestre; SERNANP = Servicio  
176 Nacional de Áreas Naturales Protegidas por el Estado).  
177

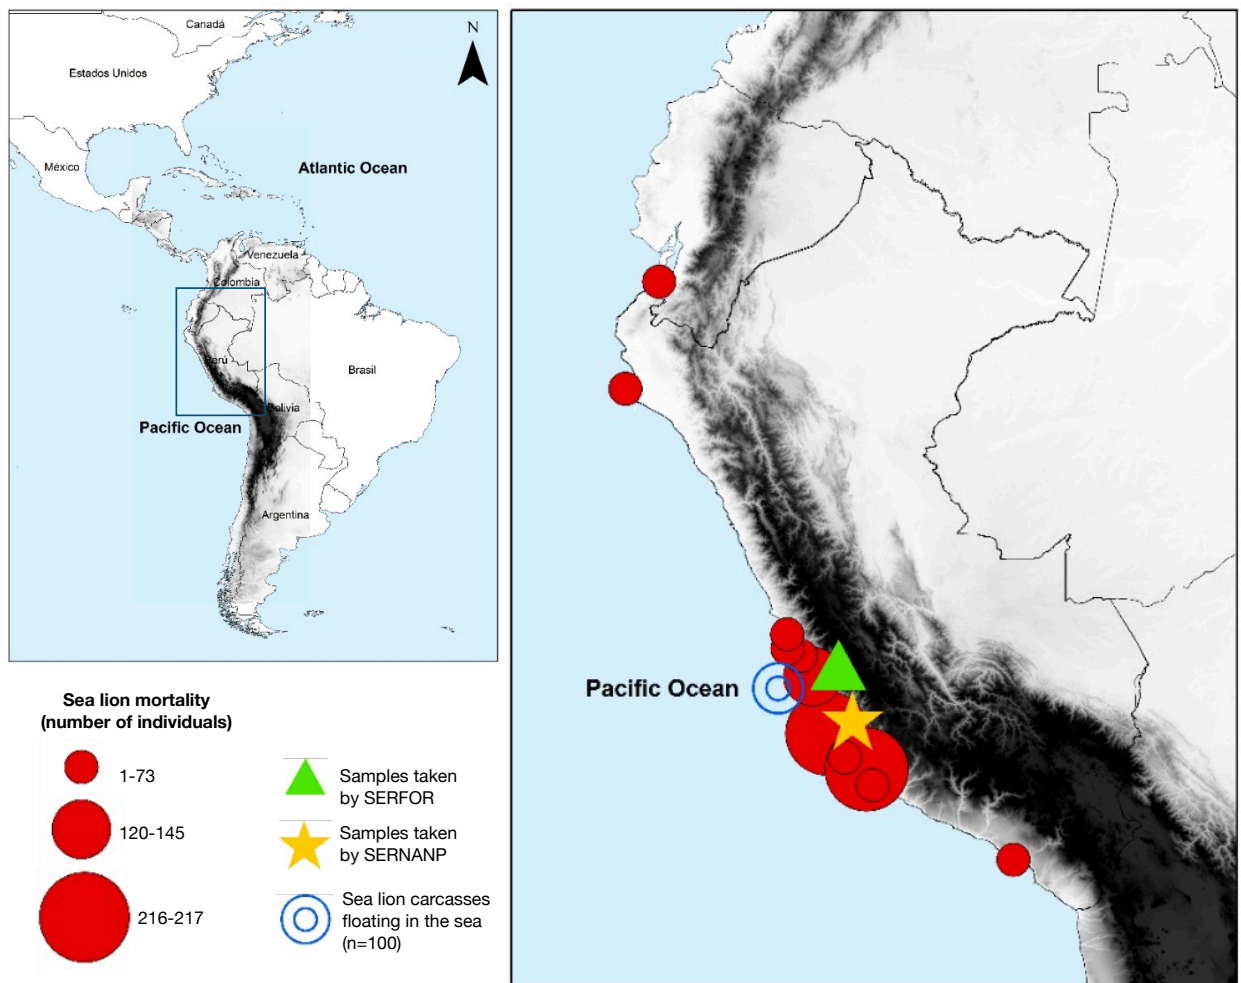

178

179

180 **Figure 2.** Images showing the field work and sample collection for testing of Highly  
181 Pathogenic Influenza Virus (H5N1) in sea lions in the Paracas National Reserve on  
182 the Peruvian coastline, February 2023. A) Sea lion carcasses on the beach; B) Dying  
183 sea lion with ataxia; C) Dead sea lion with avian flu symptoms; D) Sample collection  
184 for RT-PCR; E) Sea lion necropsy; F) Sea lion trapping and eating an infected  
185 Guanay cormorant on January 23th of 2023 (Photo: Sandra Lizarme) in the Reserva  
186 Nacional Paracas.

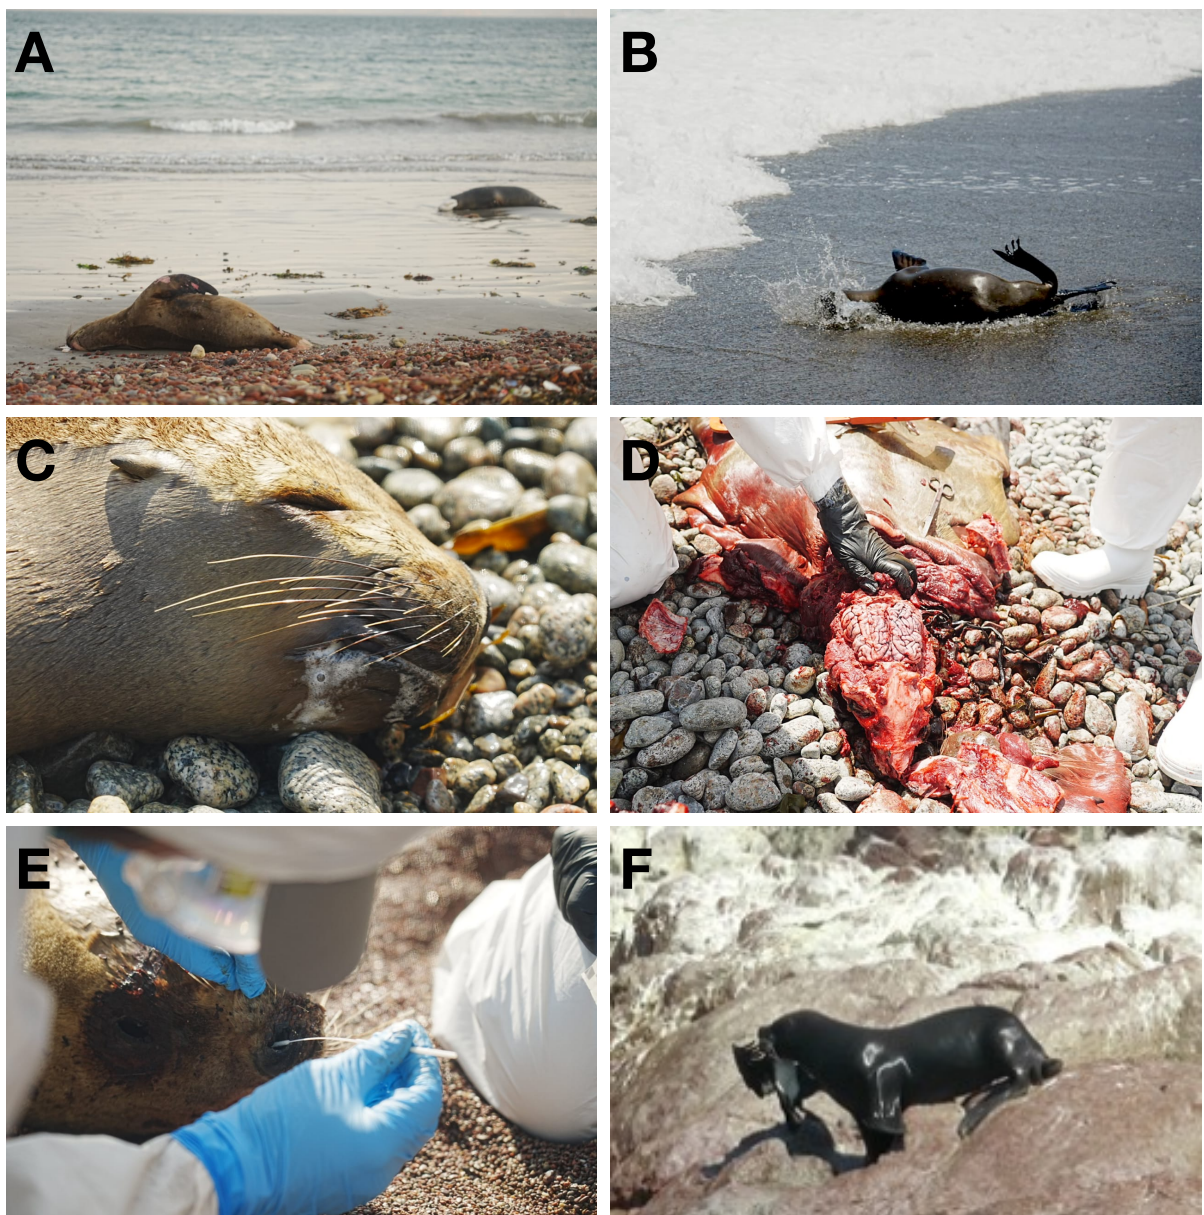

187

188 **Table 1.** Sea lion mortality and positive tests of Highly Pathogenic Influenza Virus  
 189 (H5N1) in protected areas of Peru between January and February 2023. Abbreviations  
 190 for the Natural Protected Areas are as follows: RNSF = Reserva Nacional San  
 191 Fernando, RNILLESCAS = Reserva Nacional Illescas, RNPARACAS = Reserva  
 192 Nacional Paracas, ZRANCÓN = Zona Reservada Ancón, RNSIIPG = Reserva Nacional  
 193 Sistema de Islas, Islotes y Puntas Guaneras.

| Species                                                         | Date   | Natural Protected Area | Island & Guano island                          | Symptoms                                                            | Total deaths |
|-----------------------------------------------------------------|--------|------------------------|------------------------------------------------|---------------------------------------------------------------------|--------------|
| <b>South American Fur Seal (<i>Arctocephalus australis</i>)</b> |        |                        |                                                |                                                                     |              |
|                                                                 | 26-Jan | RNSF                   |                                                |                                                                     | 3            |
|                                                                 | 5-Feb  | RNPARACAS              | Yuyos,<br>Caracolita,<br>Lagunilla, La<br>Roja |                                                                     | 1            |
| <b>South American Sea Lion (<i>Otaria flavescens</i>)</b>       |        |                        |                                                |                                                                     |              |
|                                                                 | 6-Jan  | RNILLESCAS             |                                                |                                                                     | 38           |
|                                                                 | 14-Jan | RNPARACAS              | Lagunillas,<br>Supay, Atenas                   | Eyes closed and watering,<br>nosebleeds and difficulty<br>breathing | 3            |
|                                                                 | 16-Jan | ZRANCÓN                |                                                |                                                                     | 4            |
|                                                                 | 18-Jan | RNPARACAS              | La Mina                                        |                                                                     | 1            |
|                                                                 | 19-Jan | RNPARACAS              | Aguada                                         |                                                                     | 1            |
|                                                                 |        | RNSIIPG                | Isla Cavinzas                                  |                                                                     | 1            |
|                                                                 | 20-Jan | RNPARACAS              | Lagunillas, La<br>Roja, Yumaque,<br>Atenas     |                                                                     | 32           |
|                                                                 | 21-Jan | RNPARACAS              | Santo Domingo                                  |                                                                     | 1            |
|                                                                 |        | RNSIIPG                | Punta Lomitas                                  | Foaming at the mouth,<br>convulsions, paralysis of the<br>forelimbs | 1            |
|                                                                 | 23-Jan | RNPARACAS              | Barlovento                                     |                                                                     | 6            |
|                                                                 |        |                        | Isla San Gallan                                |                                                                     | 33           |
|                                                                 |        | RNSIIPG                | Isla Cavinzas                                  |                                                                     | 3            |
|                                                                 |        |                        | Isla Pachacamac                                |                                                                     | 7            |
|                                                                 | 24-Jan | RNSIIPG                | Isla Cavinzas                                  |                                                                     | 4            |
|                                                                 | 25-Jan | RNPARACAS              | Lagunillas                                     |                                                                     | 36           |
|                                                                 |        | RNSIIPG                | Isla Cavinzas                                  |                                                                     | 6            |
|                                                                 |        |                        | Isla Asia                                      |                                                                     | 20           |
|                                                                 | 26-Jan | RNPARACAS              | Los viejos                                     |                                                                     | 24           |

|              |           |                                |                                      |            |
|--------------|-----------|--------------------------------|--------------------------------------|------------|
|              | RNSF      |                                | Carcasses floating in the sea        | 5          |
|              | RNSIIPG   | Punta San Juan                 | Convulsions (dying individuals)      | 2          |
| 27-Jan       | RNSF      |                                |                                      | 20         |
|              | RNSIIPG   | Isla Pescadores                |                                      | 2          |
|              |           | Isla Asia                      | Carcasses floating in the sea        | 100        |
|              |           | Punta San Juan                 |                                      | 8          |
|              | ZRANCÓN   |                                |                                      | 3          |
| 28-Jan       | RNPARACAS | Arquillo                       |                                      | 1          |
| 29-Jan       | RNSIIPG   | Punta San Juan                 |                                      | 2          |
| 30-Jan       | RNPARACAS | Ancla                          | Dyspnea, tremors (dying individuals) | 17         |
|              |           | Caclio                         |                                      | 4          |
|              |           | Chucho                         |                                      | 4          |
|              |           | La Raya                        |                                      | 12         |
|              |           | Punta Prieto                   |                                      | 3          |
|              |           | Rancherio                      |                                      | 5          |
| 31-Jan       | RNPARACAS | Santo Domingo                  |                                      | 12         |
|              |           | Sequion                        | Ataxia, tremors (dying individuals)  | 2          |
| 1-Feb        | RNPARACAS | Yumaque                        |                                      | 5          |
| 2-Feb        | RNPARACAS | Karwas, La Raya                | Dyspnea, tremors (dying individuals) | 9*         |
| 3-Feb        | RNSF      |                                |                                      | 188        |
| 4-Feb        | RNPARACAS | Yumaque Punta Ballena          |                                      | 3          |
|              |           | Yuyos,                         |                                      |            |
| 5-Feb        | RNPARACAS | Caracolita, Lagunilla, La Roja |                                      | 2          |
| <b>Total</b> |           |                                |                                      | <b>634</b> |

194 \*6 individuals tested, and all results were positive for the Highly Pathogenic Influenza

195 Virus (H5N1)
